# Supplementary material for: ATR inhibition using gartisertib enhances cell death and synergises with temozolomide and radiation in patient-derived glioblastoma cell lines
Source: PubMed Central journal article supplement (PMC10791076; doi:10.18632/oncotarget.28551), 2024-01-16
Supplement: oncotarget-15-28551-s002.pdf [file oncotarget-15-28551-s002.pdf]

**Supplementary Table 2: Parametric synergy analysis using MuSyC and BRAID models to assess the relationship between gartisertib, TMZ and RT within glioblastoma cell lines**

| Cell line          | MuSyC analysis        |                   |                  |                        |                            |             |                |                           |             |                 |                                    | BRAID analysis |        |          |                   |                  |
|--------------------|-----------------------|-------------------|------------------|------------------------|----------------------------|-------------|----------------|---------------------------|-------------|-----------------|------------------------------------|----------------|--------|----------|-------------------|------------------|
|                    | Efficacy <sup>a</sup> |                   |                  |                        | → TMZ potency <sup>b</sup> |             |                | → RT potency <sup>c</sup> |             |                 | → Gartisertib potency <sup>d</sup> |                |        | Kappa    |                   |                  |
|                    | TMZ + RT              | Gartisertib + TMZ | Gartisertib + RT | Gartisertib + TMZ + RT | RT                         | Gartisertib | Gartisertib+RT | TMZ                       | Gartisertib | Gartisertib+TMZ | TMZ                                | RT             | TMZ+RT | TMZ + RT | Gartisertib + TMZ | Gartisertib + RT |
| HW1                | Ant                   | Ant               | Ant              | Ant                    | Ant                        | Ant         | Syn            | Ant                       | Syn         | Ant             | Syn                                | Ant            | Ant    | Syn      | Ant               |                  |
| FPW1               | Ant                   | Ant               | Ant              | Syn                    | Syn                        | Syn         | Syn            | Ant                       | Syn         | Syn             | Syn                                | Ant            | Syn    | Syn      | Syn               |                  |
| JK2                | Ant                   | Ant               | Syn              | Ant                    | Ant                        | Ant         | Syn            | Ant                       | Syn         | Ant             | Syn                                | Syn            | Ant    | Syn      | Syn               |                  |
| BAH1               | Ant                   | Ant               | Ant              | Ant                    | Ant                        | Ant         | Ant            | Ant                       | Ant         | Ant             | Ant                                | Ant            | Ant    | Syn      | Ant               |                  |
| RKII               | Ant                   | Ant               | Ant              | Ant                    | Ant                        | Syn         | Ant            | Syn                       | Ant         | Syn             | Syn                                | Syn            | Ant    | Syn      | Syn               |                  |
| MMK1               | Ant                   | Ant               | Ant              | Ant                    | Syn                        | Syn         | Ant            | Ant                       | Ant         | Syn             | Syn                                | Ant            | Ant    | Syn      | Syn               |                  |
| SJH1               | Syn                   | Ant               | Syn              | Ant                    | Ant                        | Syn         | Ant            | Ant                       | Syn         | Ant             | Syn                                | Syn            | Ant    | Syn      | Ant               |                  |
| WK1                | Ant                   | Ant               | Ant              | Ant                    | Ant                        | Syn         | Syn            | Ant                       | Syn         | Syn             | Syn                                | Ant            | Ant    | Syn      | Syn               |                  |
| RN1                | Ant                   | Syn               | Syn              | Syn                    | Syn                        | Syn         | Ant            | Syn                       | Syn         | Syn             | Syn                                | Syn            | Ant    | Syn      | Syn               |                  |
| SB2b               | Ant                   | Ant               | Ant              | Syn                    | Ant                        | Ant         | Ant            | Ant                       | Ant         | Ant             | Syn                                | Ant            | Ant    | Syn      | Ant               |                  |
| MN1                | Ant                   | Ant               | Ant              | Ant                    | Ant                        | Syn         | Ant            | Ant                       | Ant         | Ant             | Syn                                | Ant            | Ant    | Ant      | Ant               |                  |
| PB1                | Ant                   | Ant               | Ant              | Syn                    | Ant                        | Syn         | Ant            | Syn                       | Ant         | Ant             | Ant                                | Ant            | Ant    | Syn      | Syn               |                  |
| <b>Total (syn)</b> | 1                     | 1                 | 3                | 4                      | 3                          | 8           | 4              | 3                         | 6           | 5               | 10                                 | 5              | 5      | 0        | 11                | 7                |
| <b>Total (ant)</b> | 11                    | 11                | 9                | 8                      | 9                          | 4           | 8              | 9                         | 6           | 7               | 2                                  | 7              | 7      | 12       | 1                 | 5                |

<sup>a</sup> synergistic efficacy ( $\beta$ ) of the below drug combination

<sup>b-d</sup> whether the below drug/drug combination enhances the potency (synergistic) of TMZ, RT or gartisertib or does not enhance potency (antagonistic).

Abbreviations: antagonism (ant), synergy (syn), temozolomide (TMZ), RT (radiation)
